# Supplementary material for: The Biology of Cell-free DNA Fragmentation and the Roles of DNASE1, DNASE1L3, and DFFB
Source: PubMed Central journal article supplement — Am J Hum Genet. 2020 Jan 30;106(2):202–14. doi: 10.1016/j.ajhg.2020.01.008 (PMC7010979; doi:10.1016/j.ajhg.2020.01.008), 2020-01-30
Supplement: mmc1.pdf [file mmc1.pdf]

**The American Journal of Human Genetics, Volume 106**

**Supplemental Data**

**The Biology of Cell-free DNA Fragmentation and the  
Roles of DNASE1, DNASE1L3, and DFFB**

**Diana S.C. Han, Meng Ni, Rebecca W.Y. Chan, Vicken W.H. Chan, Kathy O.  
Lui, Rossa W.K. Chiu, and Y.M. Dennis Lo**

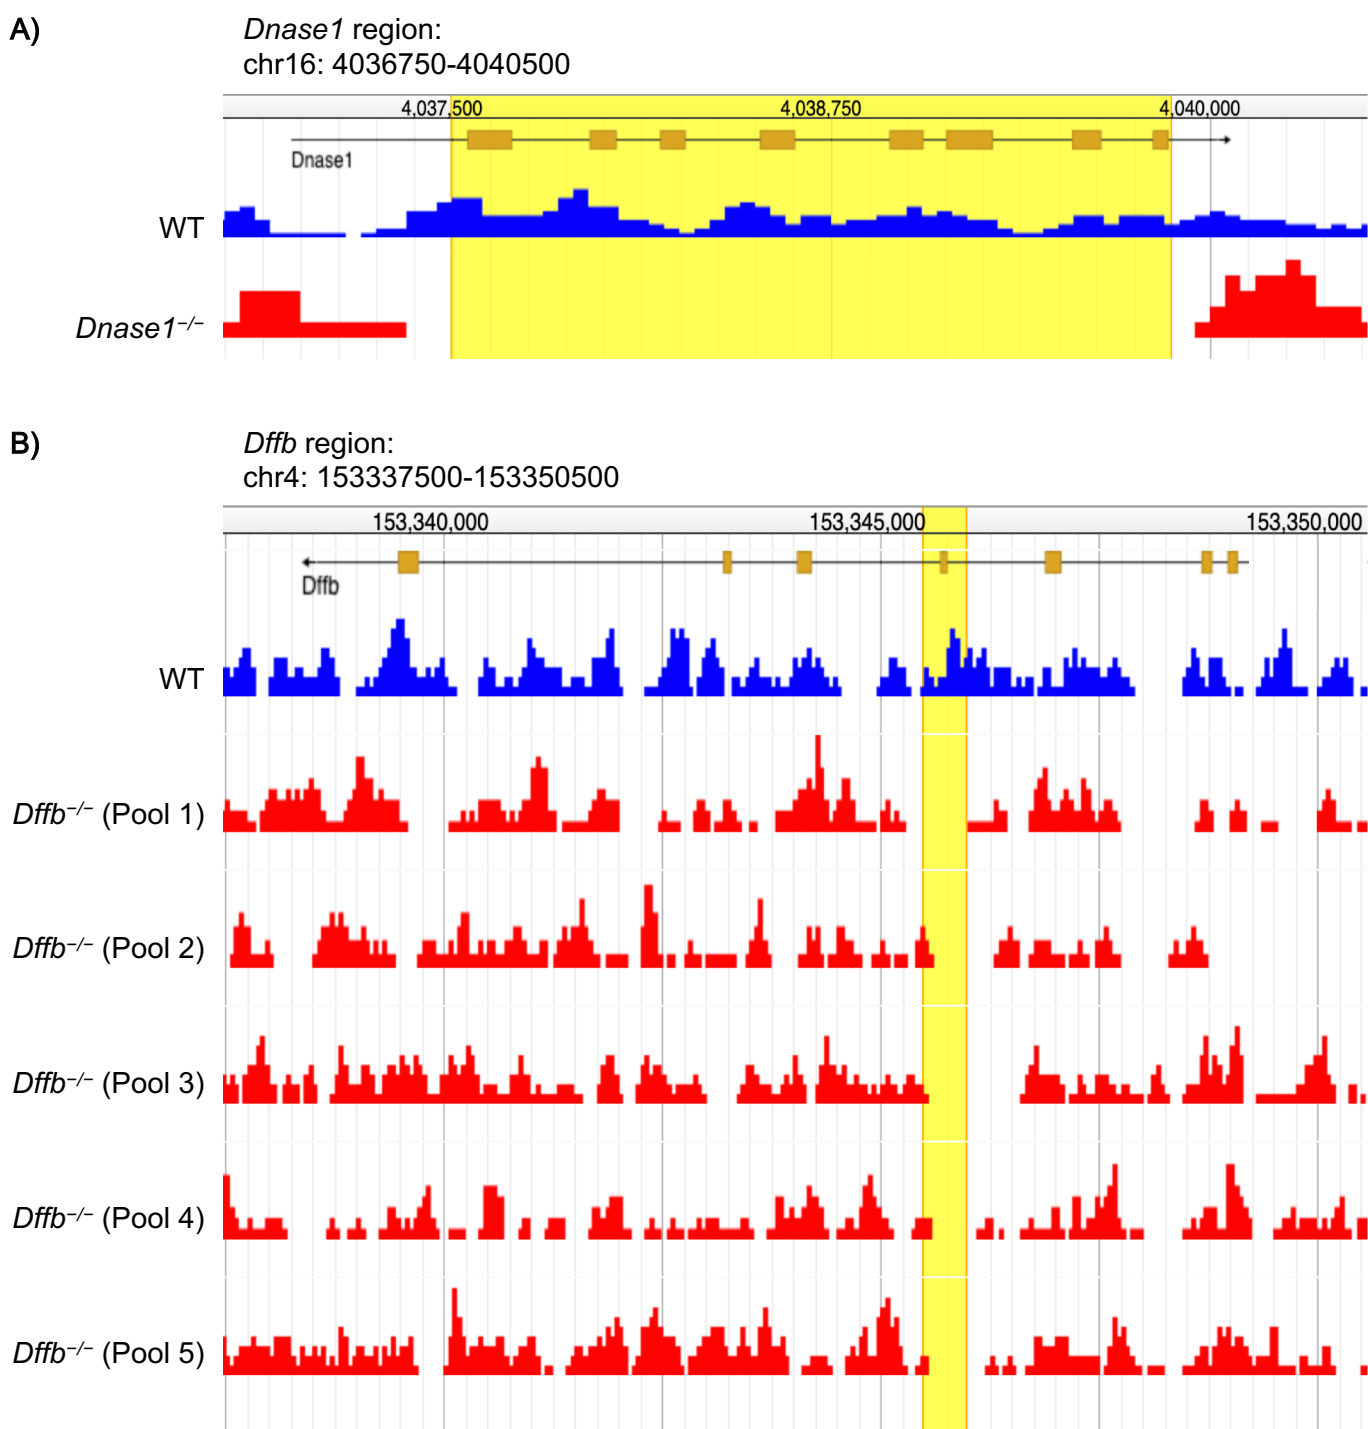

**Figure S1. Read coverage of knockout regions.**

Sequenced read coverage for plasma of WT (blue), *Dnase1*<sup>-/-</sup> mice (A, red) and *Dffb*<sup>-/-</sup> mice (Pool 1-5) (B, red). Knockout regions highlighted in yellow.

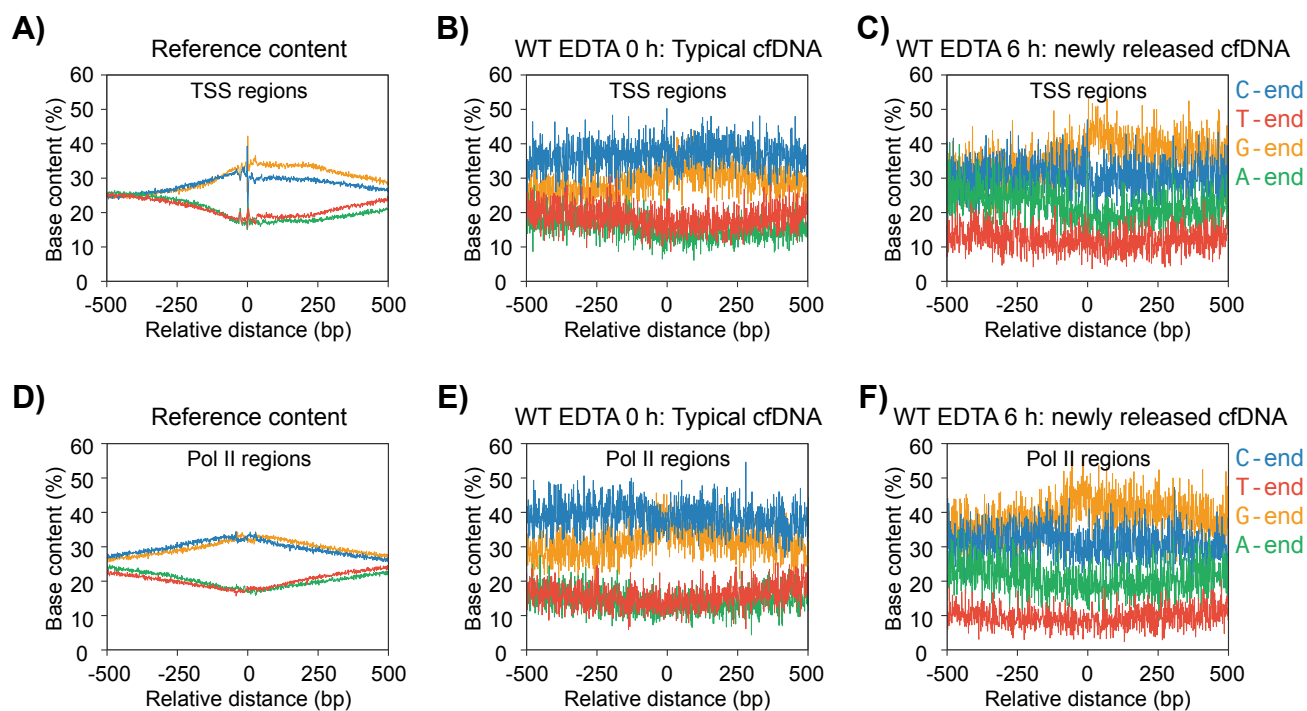

**Figure S2. Base content proportions in TSS and Pol II regions.**

(A, D) The reference murine genomic content of TSS (A) and Pol II (D) regions.

(B, E) The base content proportions at the 5' end of cfDNA fragments of WT EDTA 0 h samples in TSS (B) and Pol II (E) regions.

(C, F) The base content proportions of WT EDTA 6 h samples enriched with newly released cfDNA in TSS (C) and Pol II regions (C).

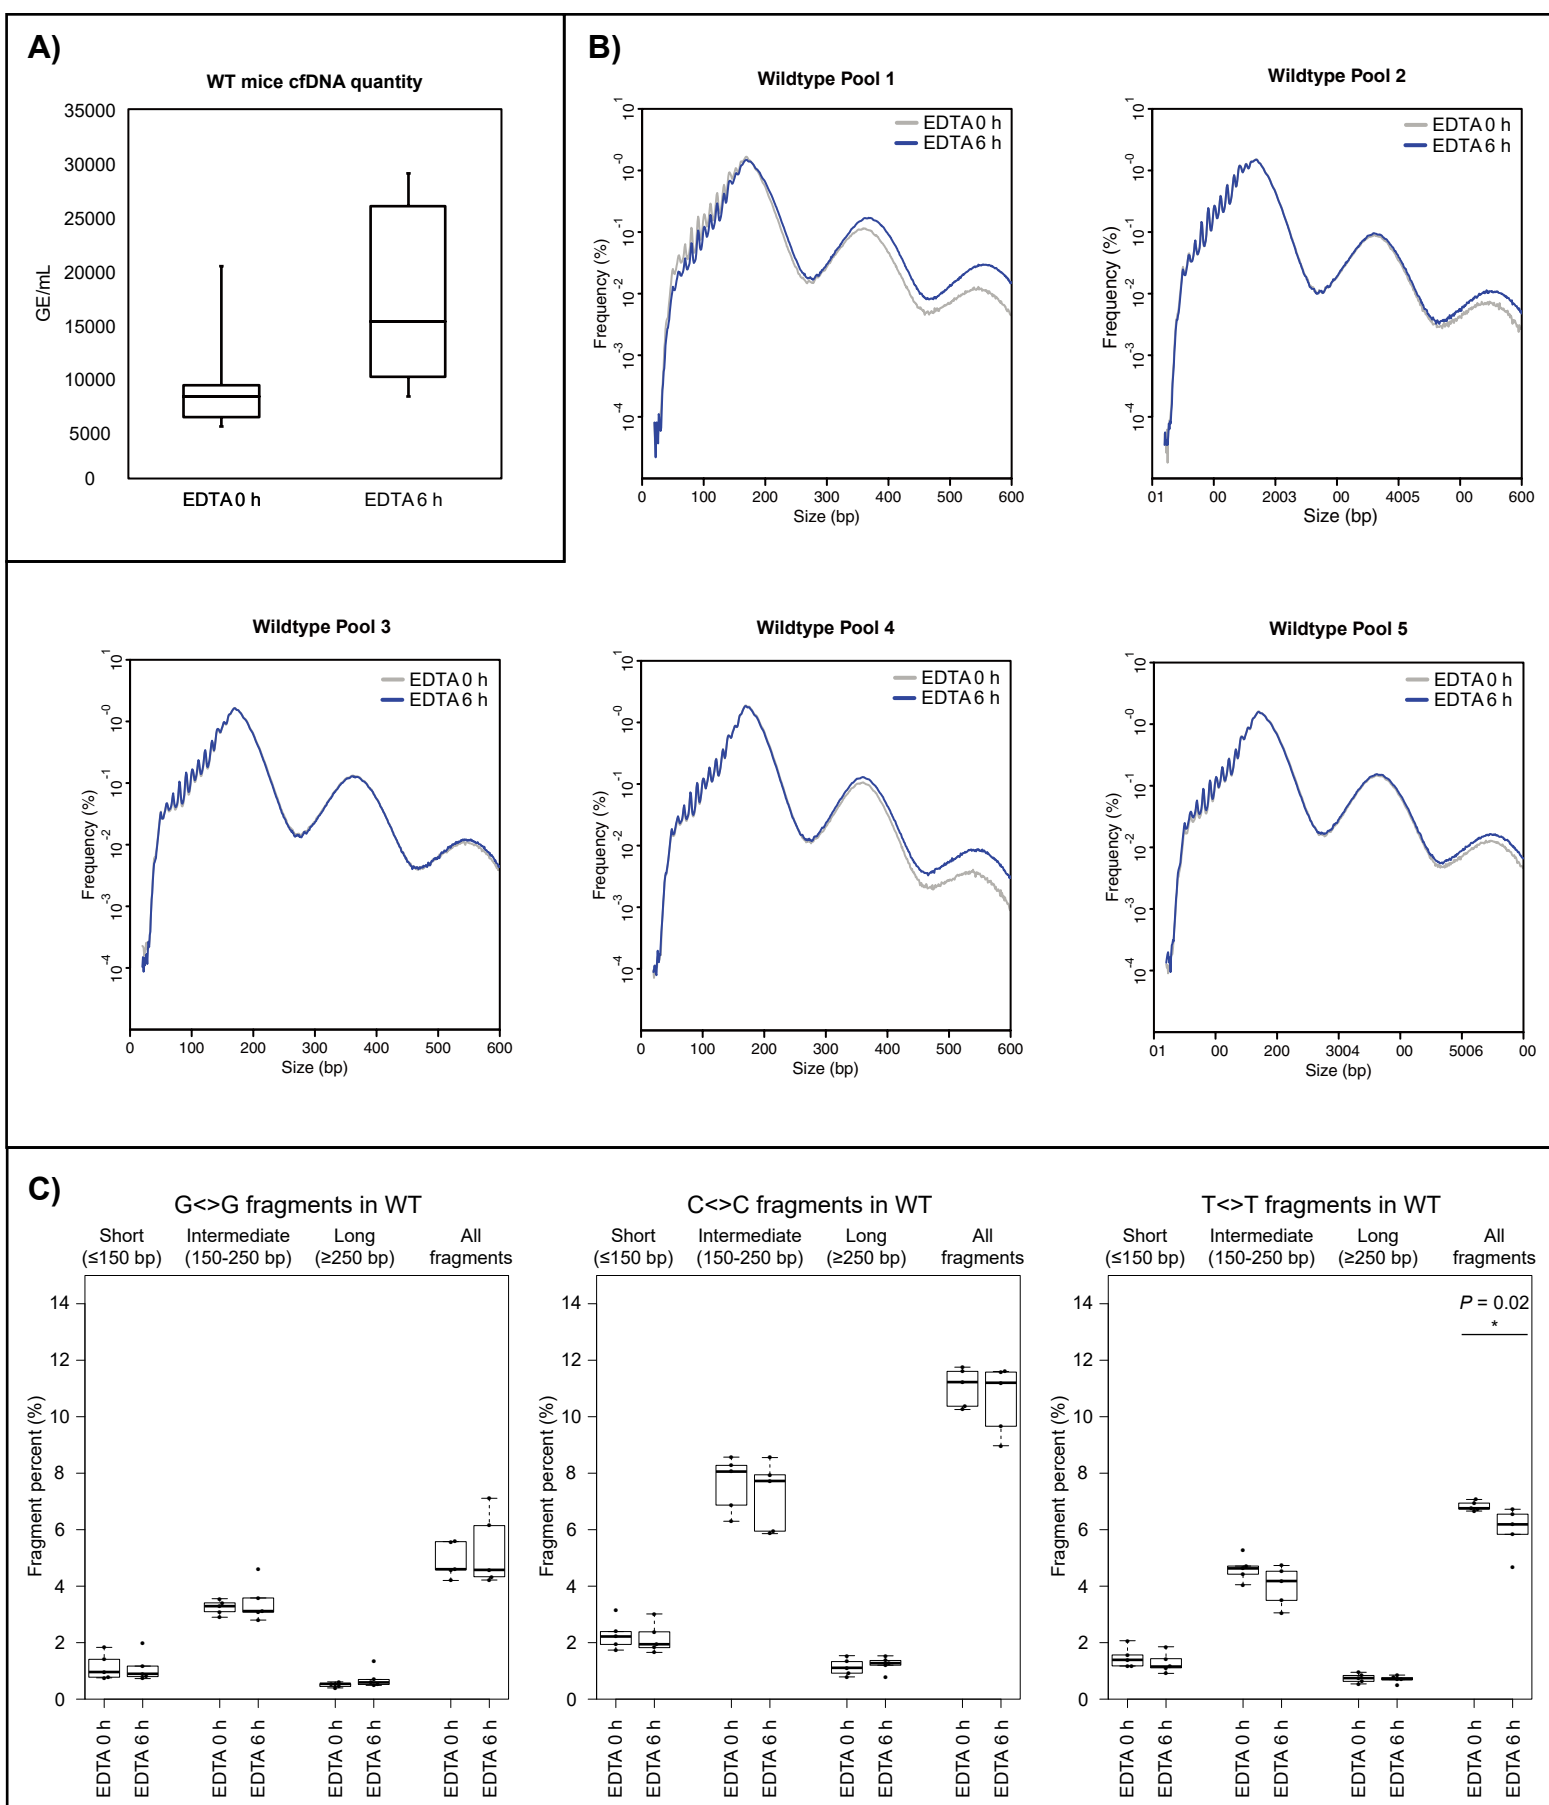

**Figure S3. EDTA 0 h vs. 6 h samples in WT mice.**

(A) cfDNA quantity in WT EDTA 0 h samples vs. EDTA 6 h samples. Measured by a droplet digital PCR assay targeting the murine transferrin receptor gene.

(B) Size profile of each pool of WT EDTA 0 h samples compared with the paired EDTA 6 h samples.

(C) G<>G, C<>C, and T<>T fragment proportions in WT mice compared between EDTA 0 h and EDTA 6 h among short, intermediate, and long fragments. P-value calculated by Mann-Whitney *U* test.

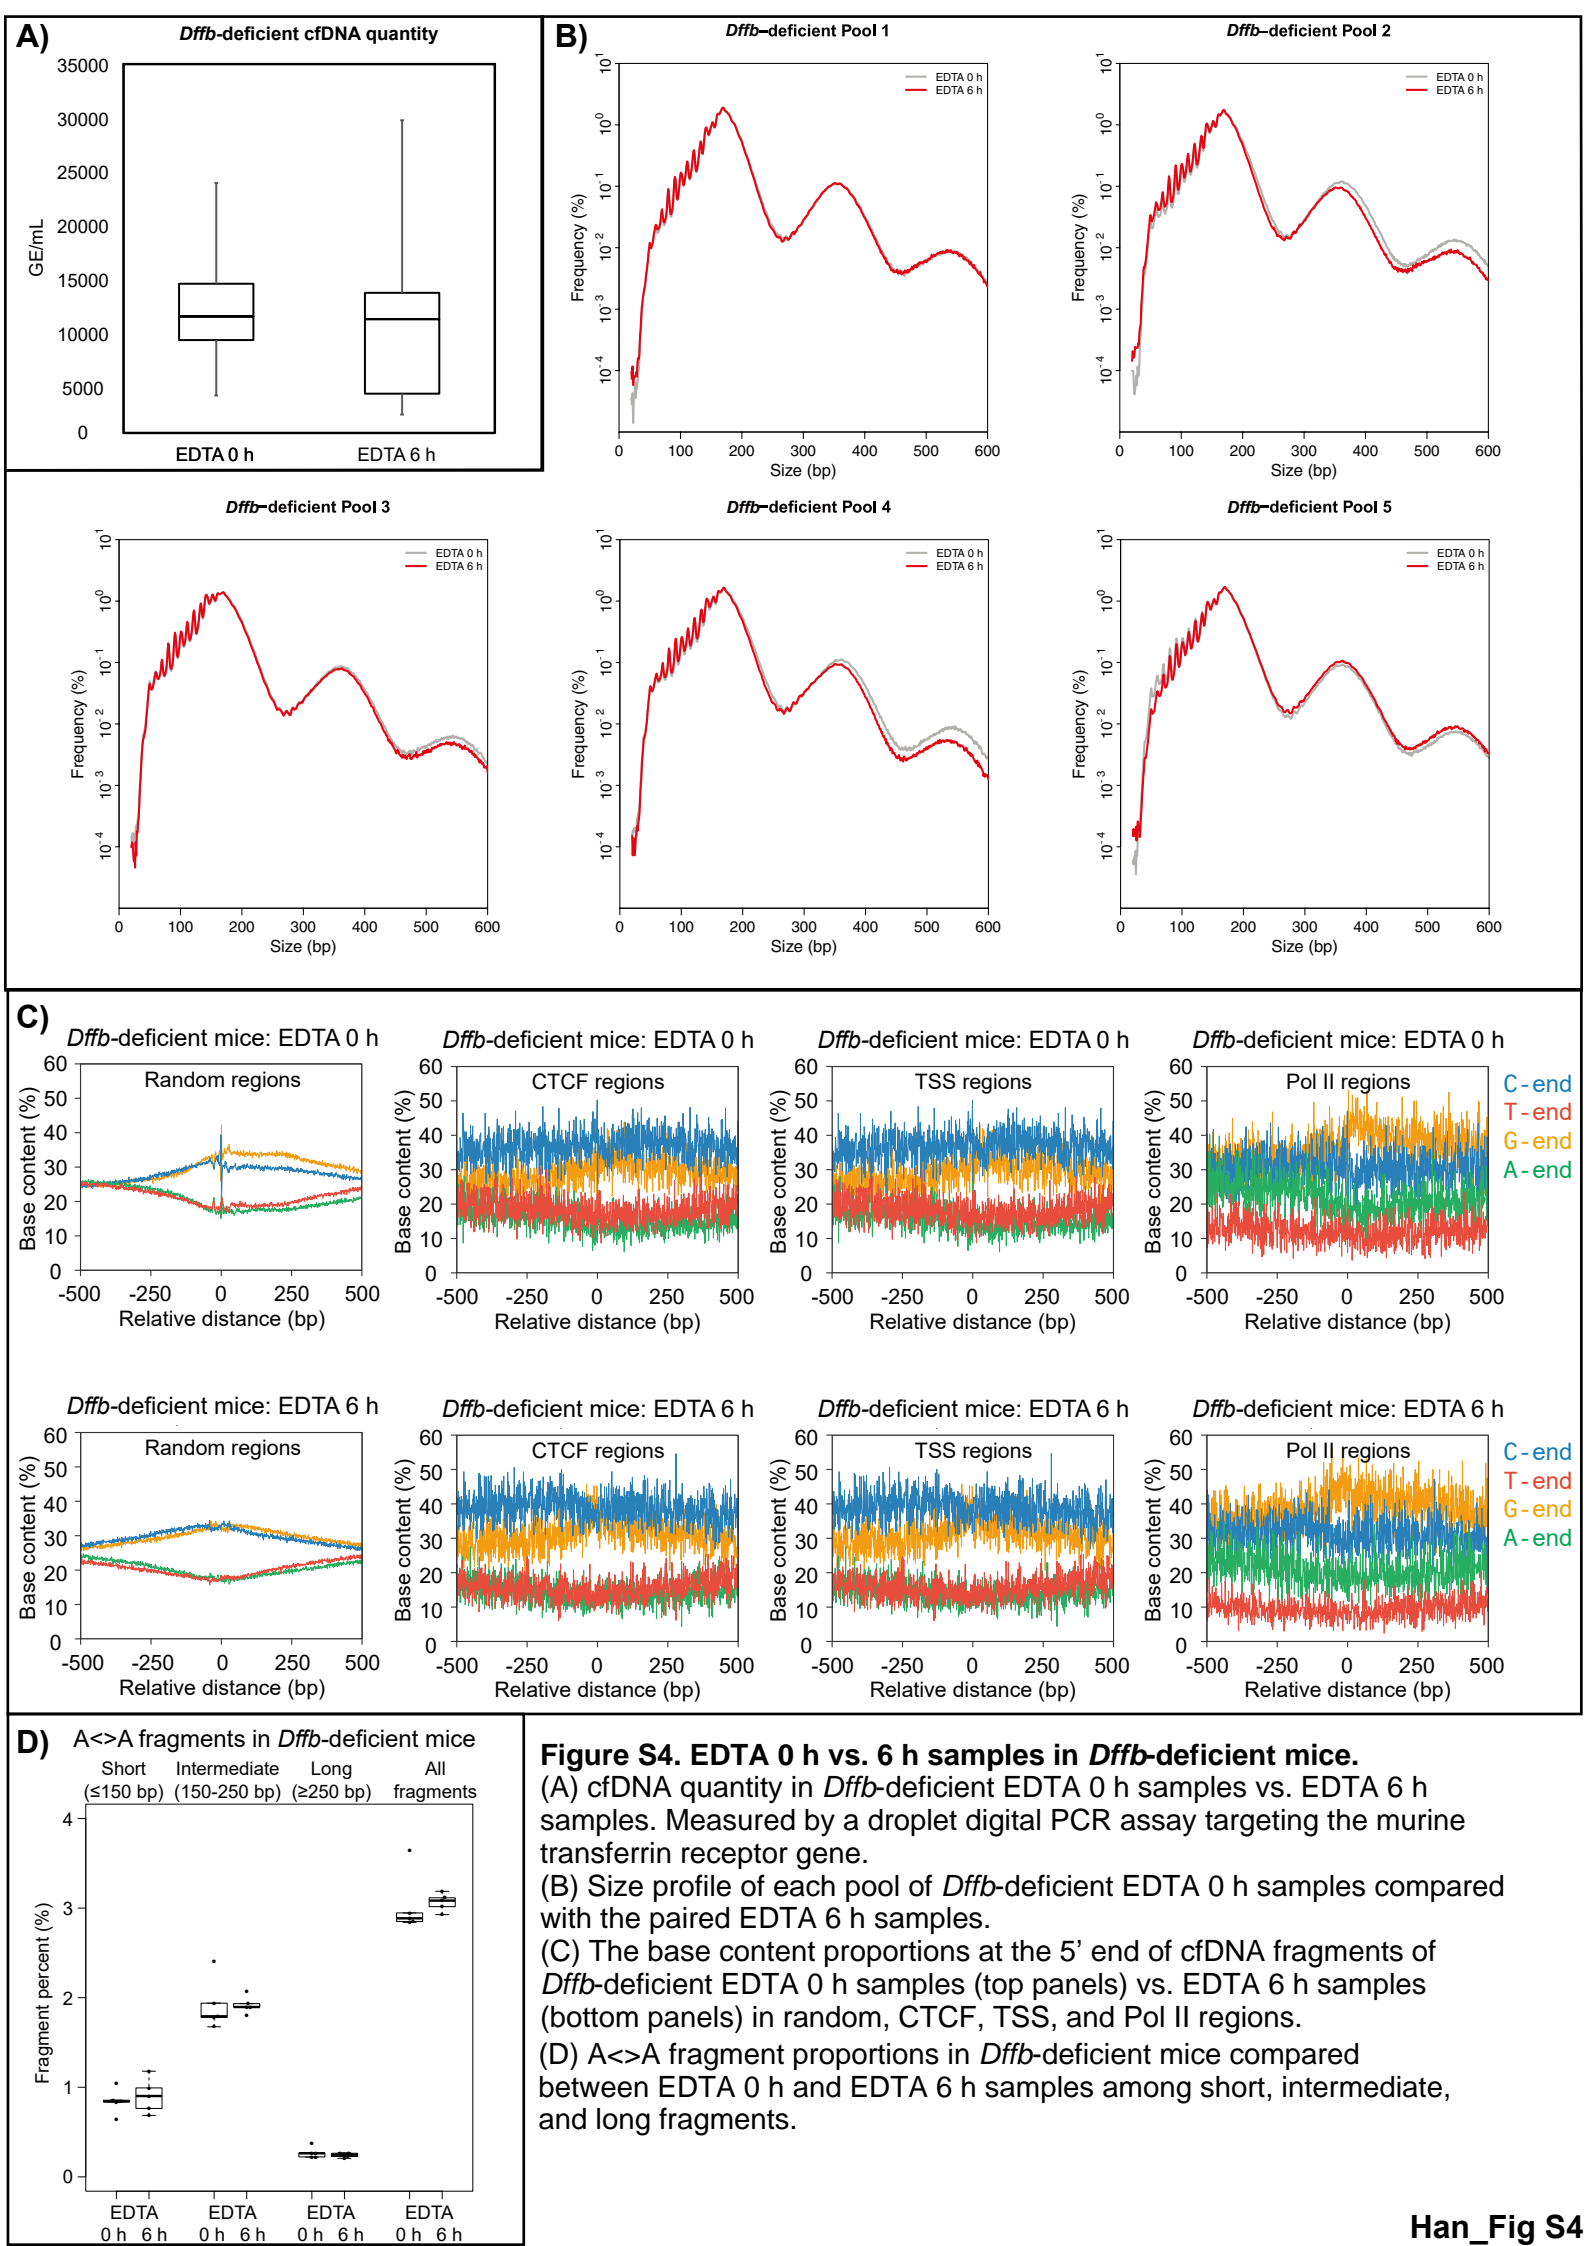

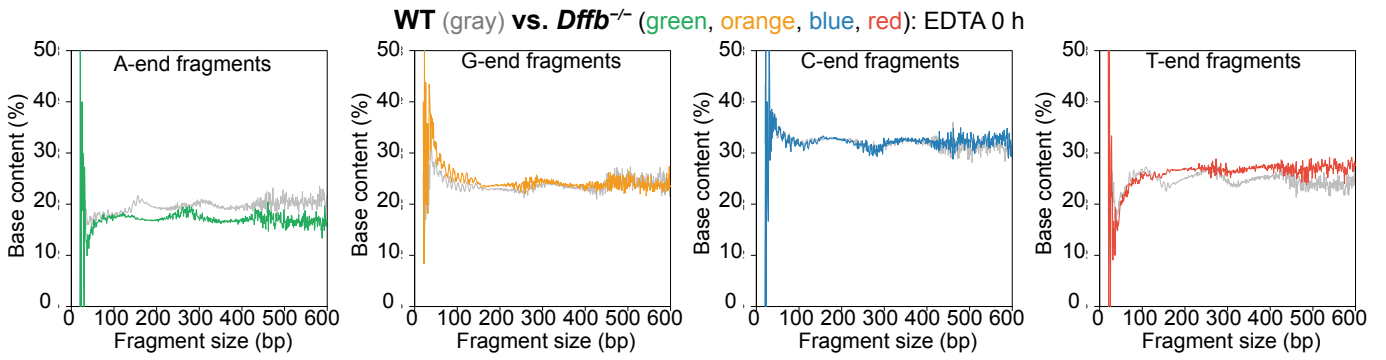

**Figure S5. WT vs. *Dffb*-deficient baseline cfDNA.**

Percentages of A-ends (green), G-ends (orange), C-ends (blue), and T-ends (red) in *Dffb*-deficient EDTA 0 h cfDNA compared with the percentages in WT EDTA 0 h cfDNA (gray).

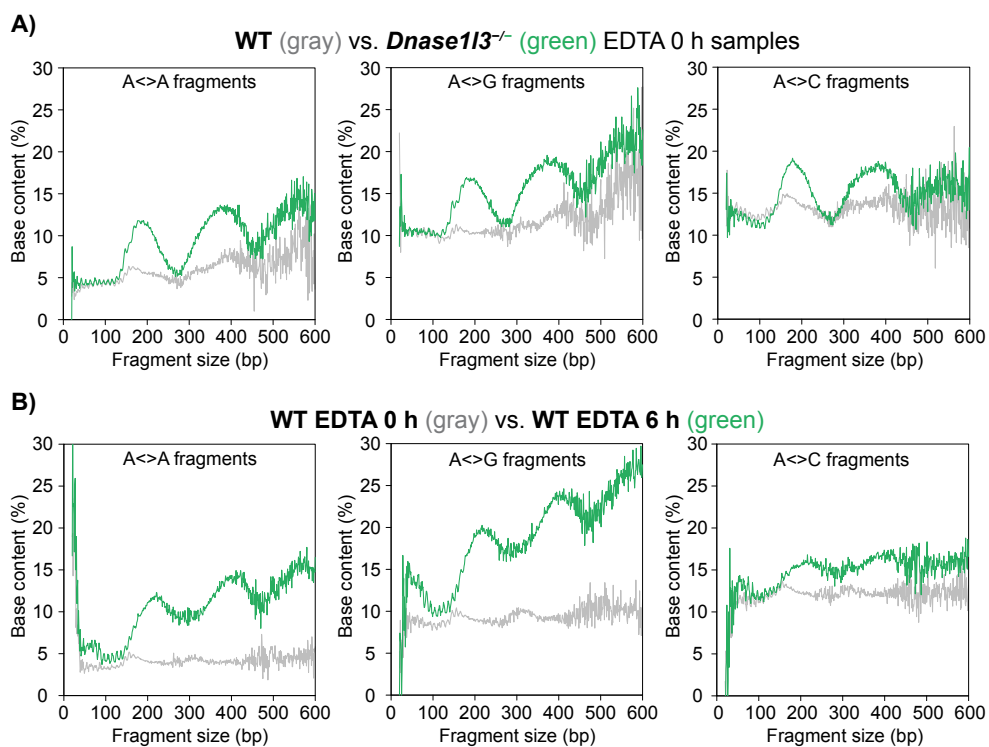

**Figure S6. Similarities in *Dnase1/3*-deficient cfDNA compared with WT fresh cfDNA (EDTA 6 h samples).**

(A) Percentages of A<->A, A<->G, and A<->C fragments in *Dnase1/3*-deficient EDTA 0 h cfDNA compared with the baseline representation of WT EDTA 0 h cfDNA (gray).

(B) Percentages of A<->A, A<->G, and A<->C fragments in WT EDTA 6 h samples enriched with newly released cfDNA compared to the baseline representation of WT EDTA 0 h cfDNA (gray).

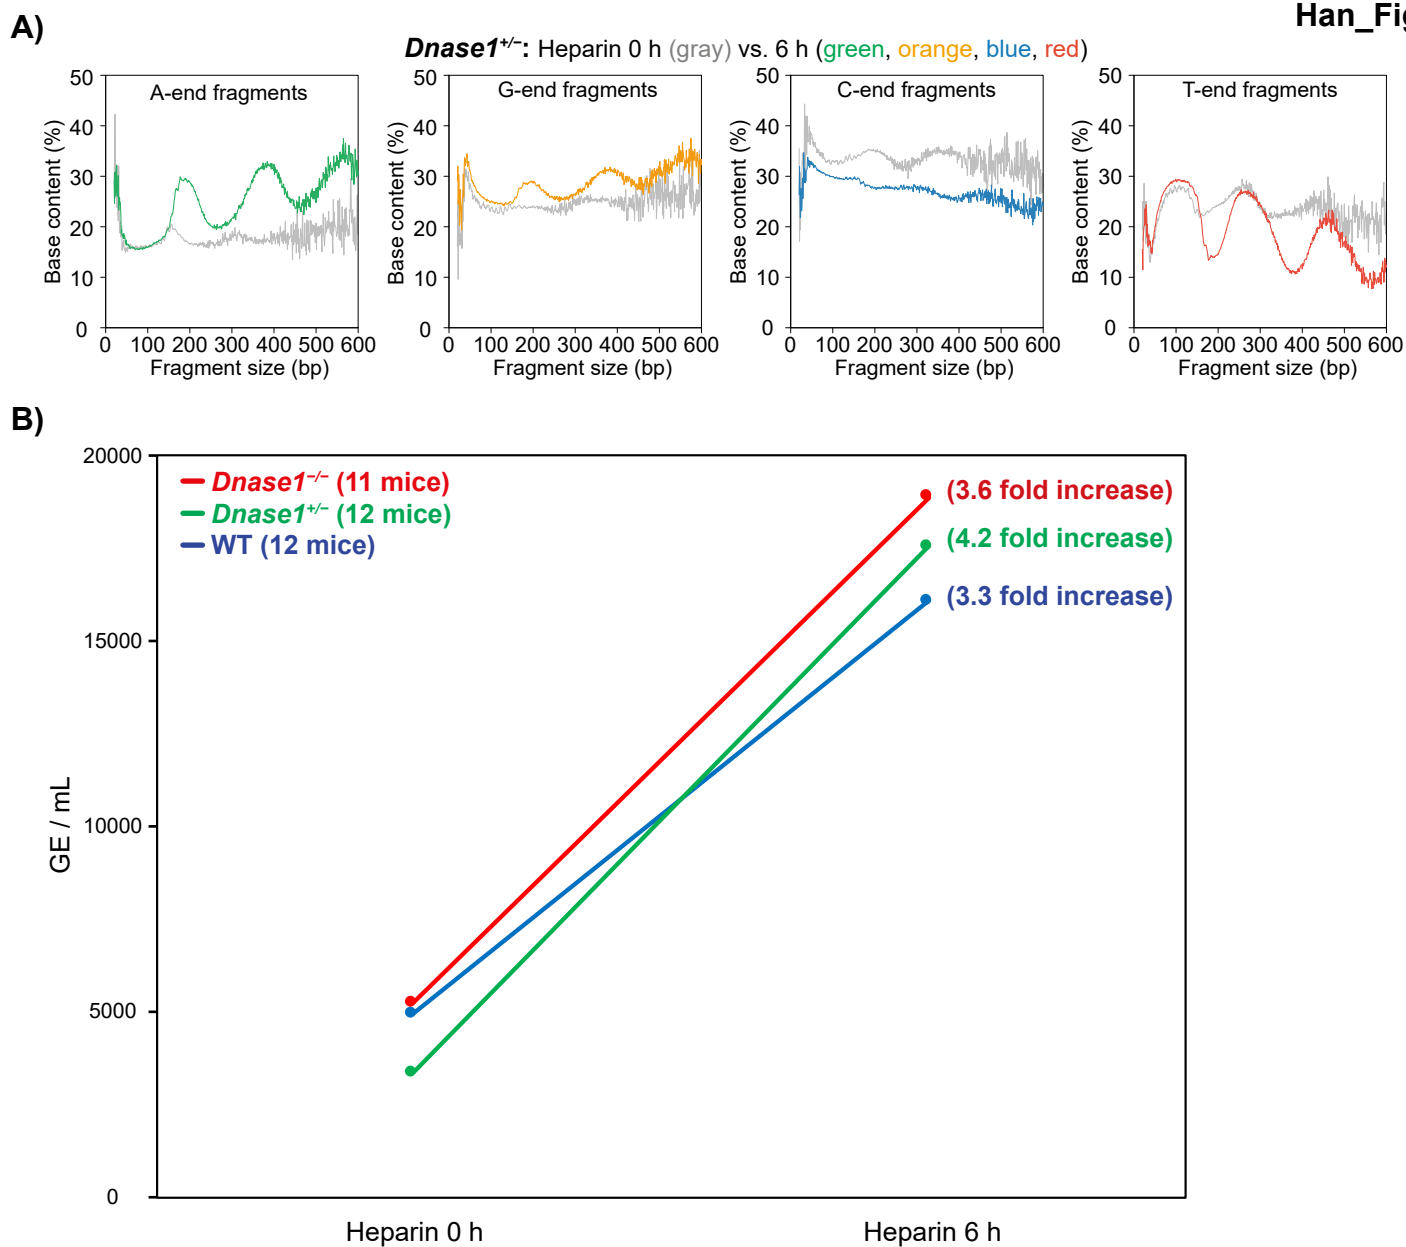

**Figure S7. Heparin effect in WT, *Dnase1<sup>+/-</sup>*, and *Dnase1<sup>-/-</sup>* mice.**

(A) Percentages of cfDNA with A-ends (green), G-ends (orange), C-ends (blue), and T-ends (red) in *Dnase1<sup>+/-</sup>* cfDNA after 6 h heparin incubation compared with its baseline at 0 h incubation (gray).

(B) cfDNA quantity increases in WT, *Dnase1<sup>+/-</sup>*, *Dnase1<sup>-/-</sup>* mice in heparin 6 h samples.



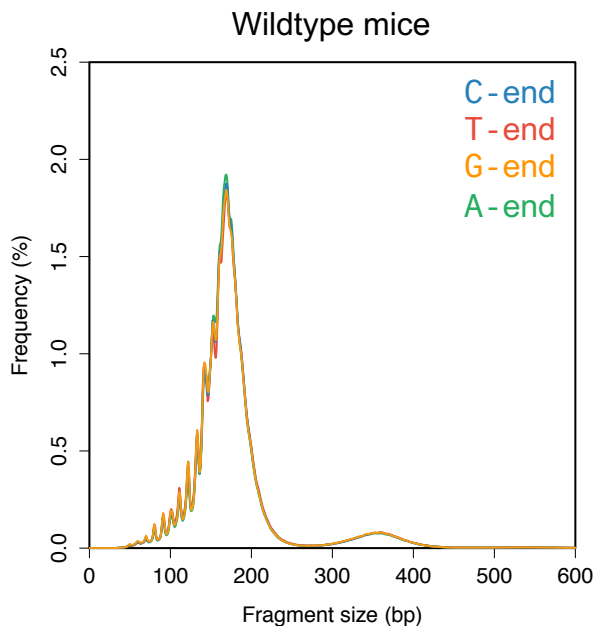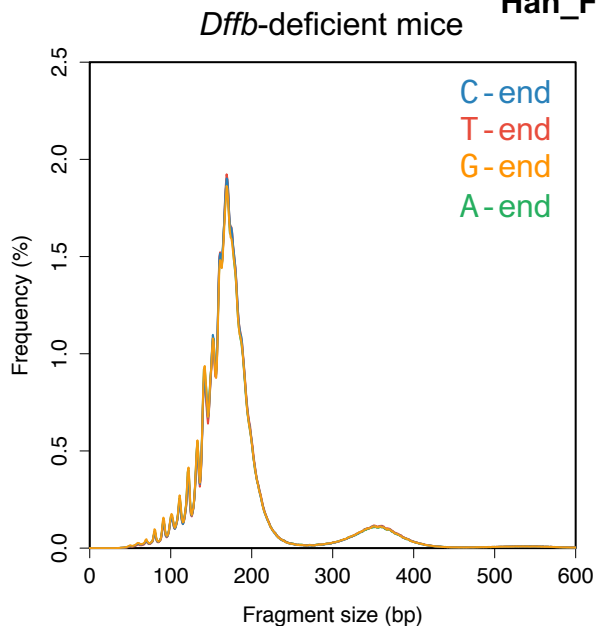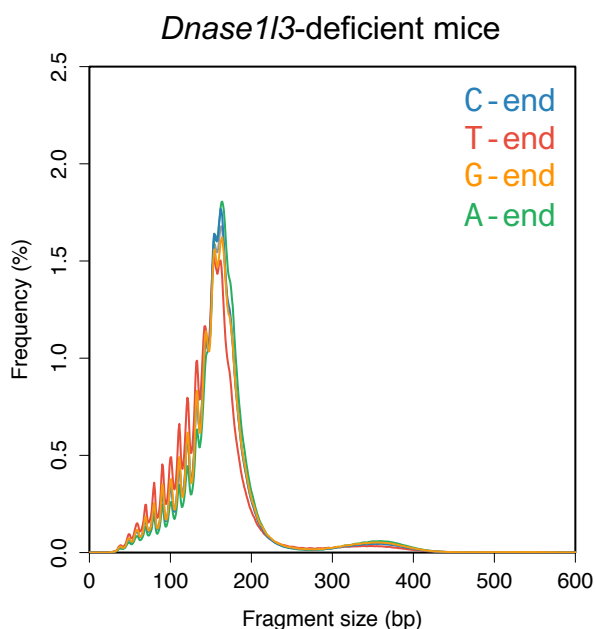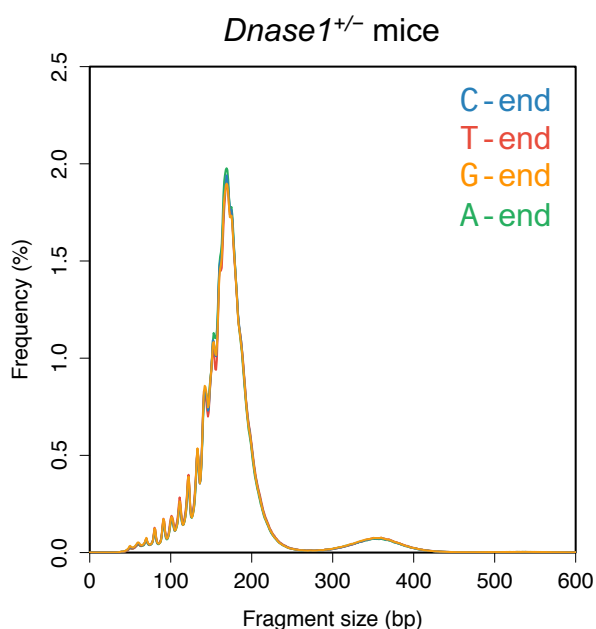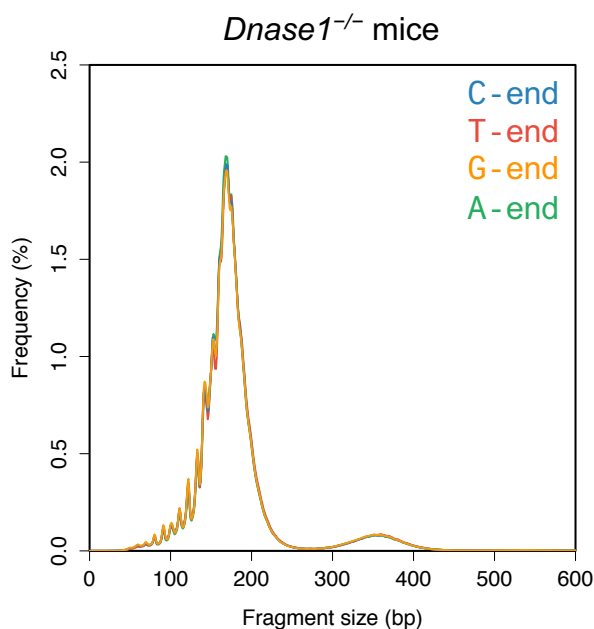

**Figure S8. 10 bp periodicity present in short 150 bp cfDNA fragments of all mice genotypes.**  
cfDNA size profile of A-end, G-end, C-end, and T-end fragments in EDTA 0 h samples of WT, *Dffb*<sup>-/-</sup>, *Dnase113*<sup>-/-</sup>, *Dnase1*<sup>+/-</sup>, and *Dnase1*<sup>-/-</sup> mice.

**Table S1.** Number of unique fragments in each sample sequenced by an Illumina platform

| Pool                                | Genotypes                    | Condition   | Number of non-duplicate fragments |
|-------------------------------------|------------------------------|-------------|-----------------------------------|
| <b><i>Dnase1</i>-deficient pool</b> | WT                           | Heparin 0hr | 16430394                          |
|                                     | WT                           | Heparin 6hr | 20736728                          |
|                                     | <i>Dnase1</i> <sup>+/-</sup> | Heparin 0hr | 17338183                          |
|                                     | <i>Dnase1</i> <sup>+/-</sup> | Heparin 6hr | 23974725                          |
|                                     | <i>Dnase1</i> <sup>-/-</sup> | Heparin 0hr | 20737940                          |
|                                     | <i>Dnase1</i> <sup>-/-</sup> | Heparin 6hr | 14322424                          |
| <b><i>Dffb</i>-deficient Pool 1</b> | WT                           | EDTA 0hr    | 11247117                          |
|                                     | WT                           | EDTA 6hr    | 13550536                          |
|                                     | <i>Dffb</i> <sup>-/-</sup>   | EDTA 0hr    | 14072590                          |
|                                     | <i>Dffb</i> <sup>-/-</sup>   | EDTA 6hr    | 13719670                          |
| <b><i>Dffb</i>-deficient Pool 2</b> | WT                           | EDTA 0hr    | 11386335                          |
|                                     | WT                           | EDTA 6hr    | 14182499                          |
|                                     | <i>Dffb</i> <sup>-/-</sup>   | EDTA 0hr    | 12071679                          |
|                                     | <i>Dffb</i> <sup>-/-</sup>   | EDTA 6hr    | 11096029                          |
| <b><i>Dffb</i>-deficient Pool 3</b> | WT                           | EDTA 0hr    | 18443065                          |
|                                     | WT                           | EDTA 6hr    | 17309666                          |
|                                     | <i>Dffb</i> <sup>-/-</sup>   | EDTA 0hr    | 18487335                          |
|                                     | <i>Dffb</i> <sup>-/-</sup>   | EDTA 6hr    | 15276638                          |
| <b><i>Dffb</i>-deficient Pool 4</b> | WT                           | EDTA 0hr    | 21106472                          |
|                                     | WT                           | EDTA 6hr    | 20338278                          |
|                                     | <i>Dffb</i> <sup>-/-</sup>   | EDTA 0hr    | 14178723                          |
|                                     | <i>Dffb</i> <sup>-/-</sup>   | EDTA 6hr    | 16550591                          |
| <b><i>Dffb</i>-deficient Pool 5</b> | WT                           | EDTA 0hr    | 18899353                          |
|                                     | WT                           | EDTA 6hr    | 20161869                          |
|                                     | <i>Dffb</i> <sup>-/-</sup>   | EDTA 0hr    | 25148138                          |
|                                     | <i>Dffb</i> <sup>-/-</sup>   | EDTA 6hr    | 17422602                          |
